# Supplementary material
Source: PubMed Central journal article supplement (PMC8522797)

**Disclosure Purpose:** 21-14583

**Summary of Interests**

I do not have any interests to disclose at this time.

**Additional Questions:**

- 1. **Are there other relationships or activities that readers could perceive to have influenced, or that give the appearance of potentially influencing, what you wrote in the submitted work?**  
No.
- 2. **What is the manuscript title?**  
Waning Immune Humoral Response to BNT162b2 COVID-19 Vaccine Over 6 Months
- 3. **Are you the corresponding author?**  
No.

**Certification**

I certify that the information provided in this disclosure is complete and accurate.

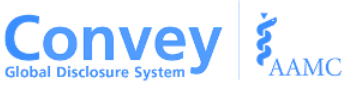

**Disclosure Purpose:** 21-14583

**Summary of Interests**

I do not have any interests to disclose at this time.

**Additional Questions:**

- 1. **Are there other relationships or activities that readers could perceive to have influenced, or that give the appearance of potentially influencing, what you wrote in the submitted work?**  
No.
- 2. **What is the manuscript title?**  
Waning Immune Humoral Response to BNT162b2 COVID-19 Vaccine Over 6 Months
- 3. **Are you the corresponding author?**  
No.

**Certification**

I certify that the information provided in this disclosure is complete and accurate.



**Disclosure Purpose:** 21-14583

**Summary of Interests**

I do not have any interests to disclose at this time.

**Additional Questions:**

- 1. **Are there other relationships or activities that readers could perceive to have influenced, or that give the appearance of potentially influencing, what you wrote in the submitted work?**  
No.
- 2. **What is the manuscript title?**  
Waning Immune Humoral Response to BNT162b2 COVID-19 Vaccine Over 6 Months
- 3. **Are you the corresponding author?**  
No.

**Certification**

I certify that the information provided in this disclosure is complete and accurate.



**Disclosure Purpose:** 21-14583

**Summary of Interests**

I do not have any interests to disclose at this time.

**Additional Questions:**

- 1. **Are there other relationships or activities that readers could perceive to have influenced, or that give the appearance of potentially influencing, what you wrote in the submitted work?**  
No.
- 2. **What is the manuscript title?**  
Waning Immune Humoral Response to BNT162b2 COVID-19 Vaccine over 6 Months
- 3. **Are you the corresponding author?**  
No.

**Certification**

I certify that the information provided in this disclosure is complete and accurate.



**Disclosure Purpose:** 21-14583

### Summary of Interests

I do not have any interests to disclose at this time.

### Additional Questions:

- Are there other relationships or activities that readers could perceive to have influenced, or that give the appearance of potentially influencing, what you wrote in the submitted work?**  
No.
- What is the manuscript title?**  
Waning Immune Humoral Response to BNT162b2 COVID-19 Vaccine Over 6 Months
- Are you the corresponding author?**  
No.

### Certification

I certify that the information provided in this disclosure is complete and accurate.



Disclosure Purpose: 21-14583

Summary of Interests

I do not have any interests to disclose at this time.

Additional Questions:

- 1. **Are there other relationships or activities that readers could perceive to have influenced, or that give the appearance of potentially influencing, what you wrote in the submitted work?**  
No.
- 2. **What is the manuscript title?**  
Waning Immune Humoral Response to BNT162b2 COVID-19 Vaccine Over 6 Months
- 3. **Are you the corresponding author?**  
No.

Certification

I certify that the information provided in this disclosure is complete and accurate.

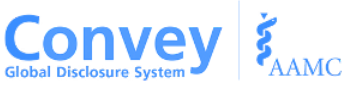

**Disclosure Purpose:** 21-14583

### Summary of Interests

I do not have any interests to disclose at this time.

### Additional Questions:

- Are there other relationships or activities that readers could perceive to have influenced, or that give the appearance of potentially influencing, what you wrote in the submitted work?**  
No.
- What is the manuscript title?**  
Waning Immune Humoral Response to BNT162b2 COVID-19 Vaccine Over 6 Months
- Are you the corresponding author?**  
No.

### Certification

I certify that the information provided in this disclosure is complete and accurate.

**Disclosure Purpose:** 21-14583

**Summary of Interests**

I do not have any interests to disclose at this time.

**Additional Questions:**

- 1. **Are there other relationships or activities that readers could perceive to have influenced, or that give the appearance of potentially influencing, what you wrote in the submitted work?**  
No.
- 2. **What is the manuscript title?**  
Waning Immune Humoral Response to BNT162b2 COVID-19 Vaccine Over 6 Months
- 3. **Are you the corresponding author?**  
No.

**Certification**

I certify that the information provided in this disclosure is complete and accurate.





**Disclosure Purpose:** 21-14583

Summary of Interests

I do not have any interests to disclose at this time.

Additional Questions:

- 1. **Are there other relationships or activities that readers could perceive to have influenced, or that give the appearance of potentially influencing, what you wrote in the submitted work?**  
No.
- 2. **What is the manuscript title?**  
Defining Correlates of COVID-19 Breakthrough infections in Vaccinated HCW
- 3. **Are you the corresponding author?**  
No.

Certification

I certify that the information provided in this disclosure is complete and accurate.

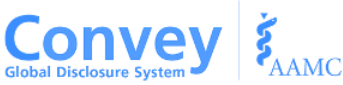

**Disclosure Purpose:** 21-14583

**Summary of Interests**

I do not have any interests to disclose at this time.

**Additional Questions:**

- 1. **Are there other relationships or activities that readers could perceive to have influenced, or that give the appearance of potentially influencing, what you wrote in the submitted work?**  
No.
- 2. **What is the manuscript title?**  
Waning Immune Humoral Response to BNT162b2 COVID-19 Vaccine Over 6 Months
- 3. **Are you the corresponding author?**  
No.

**Certification**

I certify that the information provided in this disclosure is complete and accurate.

Disclosure Purpose: 21-14583

## Summary of Interests

### Company or Organization

| Entity                                                                                                                                  | Type             | Interest Held By                                                                |
|-----------------------------------------------------------------------------------------------------------------------------------------|------------------|---------------------------------------------------------------------------------|
| <a href="#">Merck</a>                                                                                                                   | Consultant       | Self                                                                            |
| <i>Category:</i> Consultant<br><i>Additional Information:</i>                                                                           |                  | <i>Description:</i> Lecture on Merck Asia-Pacific Webinar                       |
| <a href="#">Pfizer</a>                                                                                                                  | Grant / Contract | Self                                                                            |
| <i>Recipient Name:</i> Gili Regev-Yochay<br><i>Grant / Contract Description:</i> Pneumococcal Disease<br><i>Additional Information:</i> |                  | <i>Recipient Type:</i> Institution<br><i>Grant / Contract Purpose:</i> Research |
| <a href="#">Teva Pharmaceutical Industries</a>                                                                                          | Consultant       | Self                                                                            |
| <i>Category:</i> Consultant<br><i>Additional Information:</i>                                                                           |                  | <i>Description:</i> Lectures on fluids and infection control                    |

## Additional Questions:

- Are there other relationships or activities that readers could perceive to have influenced, or that give the appearance of potentially influencing, what you wrote in the submitted work?  
No.
- What is the manuscript title?  
Waning Immune humoral response to BNT162b2 COVID-19 Vaccine over 6 months
- Are you the corresponding author?  
Yes.
  - Please list the other authors' names here.  
Einav Gal Levin, Yaniv Lustig, Carmit Cohen, Ronen Fluss, Victoria Indenbaum, Sharon Amit, Ram Doolman, Keren Asraf, Ella Mendelson, Arnona Ziv, Carmit Rubin, Laurence Freedman, Yitshak Kreiss

## Certification

I certify that the information provided in this disclosure is complete and accurate.

**Disclosure Purpose:** 21-14583

**Summary of Interests**

I do not have any interests to disclose at this time.

**Additional Questions:**

- 1. **Are there other relationships or activities that readers could perceive to have influenced, or that give the appearance of potentially influencing, what you wrote in the submitted work?**  
No.
- 2. **What is the manuscript title?**  
Waning Immune Humoral Response to BNT162b2 COVID-19 Vaccine over 6 Months
- 3. **Are you the corresponding author?**  
No.

**Certification**

I certify that the information provided in this disclosure is complete and accurate.

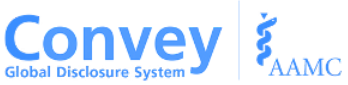

**Disclosure Purpose:** 21-14583

**Summary of Interests**

I do not have any interests to disclose at this time.

**Additional Questions:**

- Are there other relationships or activities that readers could perceive to have influenced, or that give the appearance of potentially influencing, what you wrote in the submitted work?**  
No.
- What is the manuscript title?**  
Waning Immune Humoral Response to BNT162b2 COVID-19 Vaccine Over 6 Months
- Are you the corresponding author?**  
No.

**Certification**

I certify that the information provided in this disclosure is complete and accurate.

**Disclosure Purpose:** 21-14583

Summary of Interests

I do not have any interests to disclose at this time.

Additional Questions:

- 1. **Are there other relationships or activities that readers could perceive to have influenced, or that give the appearance of potentially influencing, what you wrote in the submitted work?**  
No.
- 2. **What is the manuscript title?**  
Waning Immune Humoral Response to BNT162b2 COVID-19 Vaccine Over 6 Months
- 3. **Are you the corresponding author?**  
No.

Certification

I certify that the information provided in this disclosure is complete and accurate.



Supplement: NEJMoa2114583_disclosures.pdf [file NEJMoa2114583_disclosures.pdf]
