# Supplementary material
Source: PubMed Central journal article supplement (PMC8522797)
Supplement: NEJMoa2114583_data-sharing.pdf [file NEJMoa2114583_data-sharing.pdf]

## Data Sharing Statement

Levin EG, Lustig Y, Cohen C, et al. Waning Immune Humoral Response to BNT162b2 Covid-19 Vaccine over 6 Months. N Engl J Med. DOI: 10.1056/NEJMoa2114583.

| Question                                                            | Authors' Response                       |
|---------------------------------------------------------------------|-----------------------------------------|
| Will the data collected for your study be made available to others? | Yes                                     |
| Would you like to offer context for your decision?                  | —                                       |
| Which data?                                                         | Complete de-identified patient data set |
| Additional information about data                                   | —                                       |
| How or where can the data be obtained?                              | Gili.Regev@sheba.health.gov.il          |
| When will data availability begin?                                  | With Publication                        |
| When will data availability end?                                    | —                                       |
| Will any supporting documents be available?                         | —                                       |
| Which supporting documents?                                         | —                                       |
| Additional information about supporting documents                   | —                                       |
| How or where can supporting documents be obtained?                  | —                                       |
| When will supporting documents availability begin?                  | —                                       |
| When will supporting documents availability end?                    | —                                       |
| To whom will data be available?                                     | —                                       |
| For what type of analysis or purpose?                               | —                                       |
| By what mechanism?                                                  | —                                       |
| Any other restrictions?                                             | —                                       |
| Additional information                                              | —                                       |

This statement was posted on October 6, 2021, at NEJM.org.
